# Supplementary material for: Kinetic and thermodynamic study of 2′-hydroxy-8-methoxyflavylium. Reaction network interconverting flavylium cation and flavanone
Source: Royal Society of Chemistry journal article supplement (doi:10.1039/c3ra40846a), 2013-01-01
Supplement: c3ra40846a.pdf [file c3ra40846a.pdf]

## **Supplementary Information**

### **Kinetic and thermodynamic study of 2'-hydroxy-8-methoxyflavylium. Reaction networks interconverting flavylium cations and flavanones.**

Vesselin Petrov <sup>a,\*</sup>, Ana Marta Diniz <sup>a</sup>, Luís Cunha-Silva <sup>b</sup>, A. Jorge Parola <sup>a</sup>, Fernando Pina <sup>a</sup>

|                                                                                                                                                                                                                                                                        | <i>page</i> |
|------------------------------------------------------------------------------------------------------------------------------------------------------------------------------------------------------------------------------------------------------------------------|-------------|
| <b>1. Mole fraction distribution of species for the the equilibria descibed by <math>K_a</math>, <math>K_a^{\wedge}</math> and <math>K_a'</math></b>                                                                                                                   | S2          |
| <b>2. <math>^1\text{H}</math> and <math>^{13}\text{C}</math> NMR characterization of 2-(2'-hydroxyphenyl)-8-methoxy-1-benzopyrylium chloride (<math>\text{AH}^+</math>), <i>trans</i>-2,2'-dihydroxy-3-methoxychalcone (Ct) and 2'-hydroxy-3'-methoxyflavanone (F)</b> | S3          |

## 1. Mole fraction distribution of species for the equilibria described by $K_a$ , $K_a^{\wedge}$ and $K_a^{\circ}$

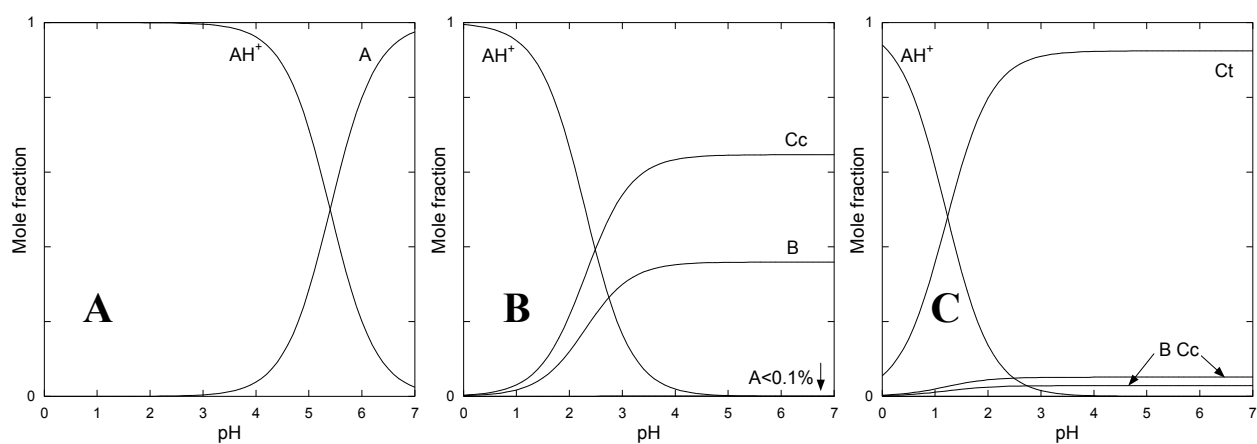

**Figure S1.** Mole fraction distribution of species corresponding to the equilibria described in Fig. 2 of the manuscript:  
**A** - 4.5 ms after a pH jump from pH=0.6 to higher pH values ( $K_a$ );  
**B** - The same as in A but after *ca.* 1 min after the pH jump ( $K_a^{\wedge}$ );  
**C** - The same as in A after upon final thermodynamic equilibrium (*ca.* 8h;  $K_a^{\circ}$ ).

2. <sup>1</sup>H and <sup>13</sup>C NMR characterization of 2-(2'-hydroxyphenyl)-8-methoxy-1-benzopyrylium chloride (AH<sup>+</sup>),  
*trans*-2,2'-dihydroxy-3-methoxychalcone (Ct) and 2'-hydroxy-3'-methoxyflavanone (F)

Table S1 – <sup>1</sup>H (δ/ppm, multiplicity, J/Hz) and <sup>13</sup>C (δ/ppm) NMR data for AH<sup>+</sup> (D<sub>2</sub>O/DCl, pD~1), Ct and F (CDCl<sub>3</sub>).

| Position               | AH <sup>+</sup> |                    | Ct              |                        | F               |                                                     |
|------------------------|-----------------|--------------------|-----------------|------------------------|-----------------|-----------------------------------------------------|
|                        | <sup>13</sup> C | <sup>1</sup> H     | <sup>13</sup> C | <sup>1</sup> H         | <sup>13</sup> C | <sup>1</sup> H                                      |
| <b>1</b>               |                 |                    | 120.5           |                        |                 |                                                     |
| <b>2</b>               | 173.8           |                    | 163.8           |                        | 74.9            | 5.87, dd, 12.7, 3.6                                 |
| <b>2OH</b>             |                 |                    |                 | 12.90, s               |                 |                                                     |
| <b>3</b>               | 121.0           | 8.64, d, 9.2       | 146.3           |                        | 43.5            | (a) 3.06, dd, 16.9, 12.7<br>(b) 2.98, dd, 16.9, 3.6 |
| <b>4</b>               | 155.6           | 8.91, d, 9.2       | 112.5           | 6.92, dd, ~7, ~2       | 192.6           |                                                     |
| <b>4a</b>              | 137.0           |                    |                 |                        | 121.3           |                                                     |
| <b>5</b>               | 119.0           | 7.46, d, 8.1       | 120.0           | 6.89, dd               | 127.3           | 7.95, dd, 7.8, 1.7                                  |
| <b>6</b>               | 130.2           | 7.54, dd, 8.1, 8.1 | 122.4           | 7.20, dd, 5.6, 2.2     | 121.6           | 7.05, ddd, ~8, ~8, ~2                               |
| <b>7</b>               | 120.5           | 7.43, d, 8.1       |                 |                        | 136.1           | 7.50, ddd, ~7, ~7, 1.8                              |
| <b>8</b>               | 155.7           |                    |                 |                        | 118.3           | 7.06, dd, ~8, ~2                                    |
| <b>8a</b>              | 156.3           |                    |                 |                        | 162.1           |                                                     |
| <b>α</b>               |                 |                    | 121.9           | 7.92, d, 15.7          |                 |                                                     |
| <b>β</b>               |                 |                    | 141.0           | 8.13, d, 15.7          |                 |                                                     |
| <b>1'</b>              | 113.7           |                    | 121.4           |                        | 125.0           |                                                     |
| <b>2'</b>              | 155.5           |                    | 147.1           |                        | 142.8           |                                                     |
| <b>2'OH</b>            |                 |                    |                 | 6.37, br s             |                 | 5.89, br s                                          |
| <b>3'</b>              | 118.0           | 6.70, d, 8.3       | 118.7           | 7.02, dd, ~7, 1.1      | 146.7           |                                                     |
| <b>4'</b>              | 139.7           | 7.30, dd, 8.1, 8.1 | 136.3           | 7.48, ddd, ~7, ~7, 1.6 | 110.8           | 6.88, dd, ~8, 1.3                                   |
| <b>5'</b>              | 121.5           | 6.76, dd, 8.1, 8.3 | 118.9           | 6.93, dd               | 120.2           | 6.94, dd                                            |
| <b>6'</b>              | 130.6           | 7.79, d, 8.1       | 130.0           | 7.94, dd, 8.0, 1.6     | 118.9           | 7.18, dd, 5.1, 1.2                                  |
| <b>OCH<sub>3</sub></b> | 56.8            | 3.86, s            | 56.5            | 3.94, s                | 56.3            | 3.92, s                                             |
| <b>C=O</b>             |                 |                    | 194.6           |                        |                 |                                                     |
